# Supplementary material for: Elevated mucosal antibody responses against SARS-CoV-2 are correlated with lower viral load and faster decrease in systemic COVID-19 symptoms
Source: bioRxiv or medRxiv preprint supplement (doi:10.1101/2021.02.02.21250910), 2021-02-03
Supplement: Supplementary file [file media-1.pdf]

| Variable               | Index cases (n=50) | Household contacts (n=137) |
|------------------------|--------------------|----------------------------|
| Age median [IQR]       | 46 [37-54]         | 21 [13-46]                 |
| <b>Age groups n(%)</b> |                    |                            |
| 0-12 years             | -                  | 33 (24)                    |
| 13-18 years            | -                  | 23 (17)                    |
| 19-49 years            | 31 (62)            | 50 (36)                    |
| 50+ years              | 19 (28)            | 31 (23)                    |
| <b>Sex Female n(%)</b> | 38 (76)            | 54 (39)                    |
| <b>Diagnosis n(%)</b>  |                    |                            |
| PCR+                   | 46 (92)            | 48 (35)                    |
| PCR- Sero+             | 3 (6)              | 22 (15)                    |
| PCR- Sero- MLF+        | 1 (2)              | 5 (4)                      |

**Table S1 | General characteristics of study participants.**

|                 | Index cases (n=50) | Household cases (n=75) |
|-----------------|--------------------|------------------------|
| <b>PCR +</b>    | <b>46 (92)</b>     | <b>48 (64)</b>         |
| PCR+ sero+ MLF+ | 43 (86)            | 42 (56)                |
| PCR+ sero+ MLF- | 2 (4)              | 1 (1)                  |
| PCR+ sero- MLF+ | 0                  | 1 (1)                  |
| PCR+ sero- MLF- | 1 (2)              | 4 (5)                  |
| <b>Sero +</b>   | <b>48 (96)</b>     | <b>65 (87)</b>         |
| PCR- sero+ MLF+ | 3 (6)              | 9 (12)                 |
| PCR- sero+ MLF- | 0                  | 13 (17)                |
| <b>MLF +</b>    | <b>46 (92)</b>     | <b>57 (76)</b>         |
| PCR- sero- MLF+ | 1 (2)              | 5 (7)                  |

**Table S2 | PCR, serum and mucosal positivity against SARS-CoV-2 in index and household cases.** The PCR positive threshold was set at a Ct value <36, corresponding to a viral load of  $\geq 10^3$  copies/ml of extracted sample. The seroconversion threshold was based on the mean + 2\*SD of the log<sub>2</sub>-transformed pre-SARS-CoV-2 control samples. To identify cases based on mucosal antibodies against S, a naive Bayes model was used, trained by the mucosal antibody measurements of the PCR positive study participants (cases) and the pre-SARS-CoV-2 control MLF samples (controls).
