# Supplementary material for: Elevated mucosal antibody responses against SARS-CoV-2 are correlated with lower viral load and faster decrease in systemic COVID-19 symptoms
Source: bioRxiv or medRxiv preprint supplement (doi:10.1101/2021.02.02.21250910), 2021-02-03
Supplement: Supplementary file [file media-2.pdf]

Figure S1

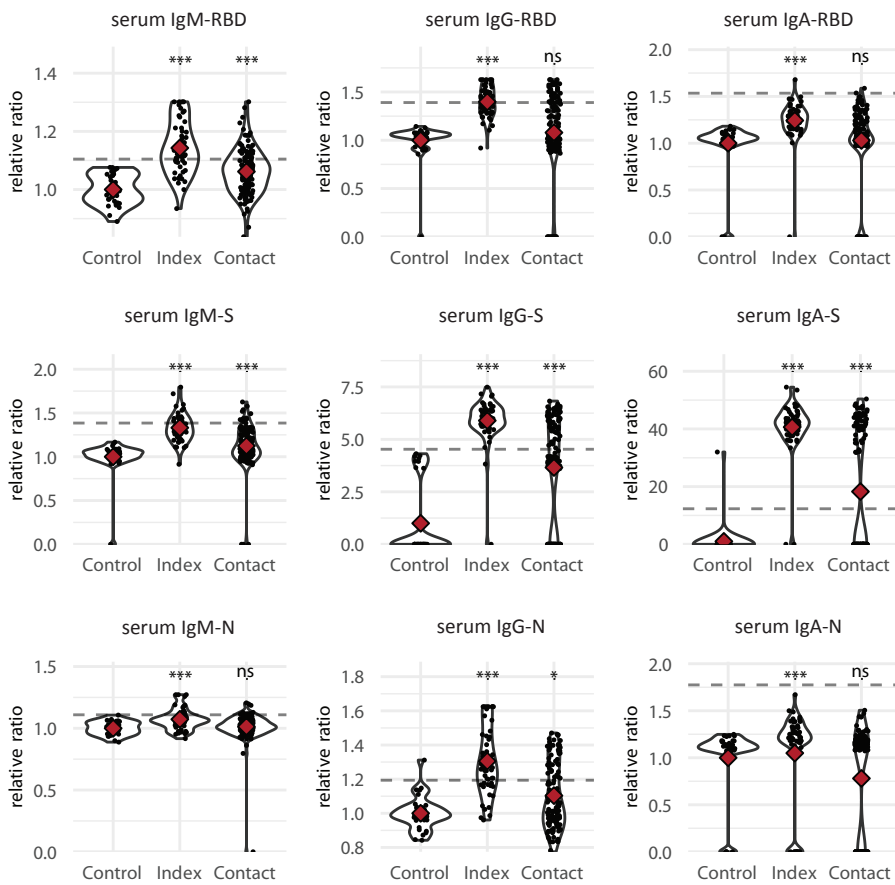

**Figure S1. Serum antibody responses against Sars-CoV-2 in COVID-19 patients and household contacts.** IgM, IgG, and IgA serum antibody responses against Sars-CoV-2 spike protein (S), receptor binding domain (RBD), or nucleocapsid (N). Data are shown for pre-SARS-Cov-2 control samples (N=32), index cases (N=50), or household contacts (N=129). Antibody levels are expressed as a ratio compared to the mean of the controls (relative ratio) and values of indexes and contacts were compared to those of controls using a Wilcoxon signed rank test, \* p < 0.05; \*\* p < 0.01; \*\*\* p < 0.001, and a threshold for seroconversion (dotted line) was calculated based on the mean + 2\*sd of the control samples.
