# Supplementary material for: Elevated mucosal antibody responses against SARS-CoV-2 are correlated with lower viral load and faster decrease in systemic COVID-19 symptoms
Source: bioRxiv or medRxiv preprint supplement (doi:10.1101/2021.02.02.21250910), 2021-02-03
Supplement: Supplementary file [file media-6.pdf]

Figure S2

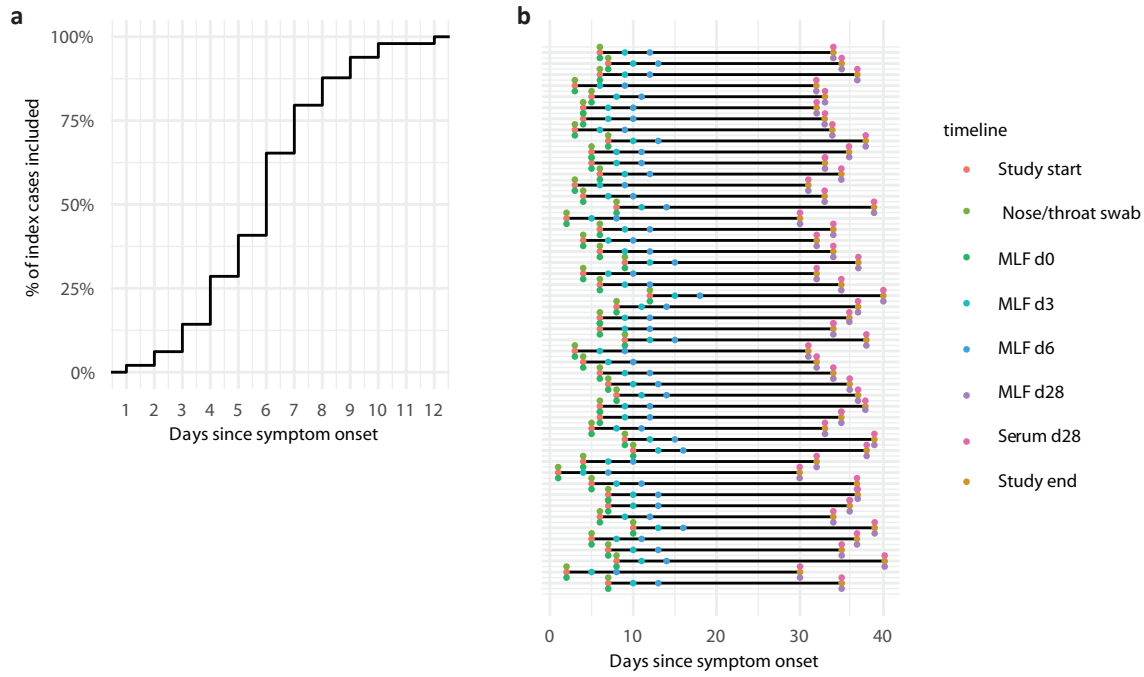

**Figure S2. Timing of COVID-19 patient recruitment and sample measurements relative to symptoms onset. a)** The graph shows the cumulative percentage of households (N=50) included at a given time post symptom onset. **b)** Overview of the measurements made for the index cases relative to the reported first day of symptom onset. Each line represents one participant.
