# Supplementary material for: Elevated mucosal antibody responses against SARS-CoV-2 are correlated with lower viral load and faster decrease in systemic COVID-19 symptoms
Source: bioRxiv or medRxiv preprint supplement (doi:10.1101/2021.02.02.21250910), 2021-02-03
Supplement: Supplementary file [file media-7.pdf]

Figure S3

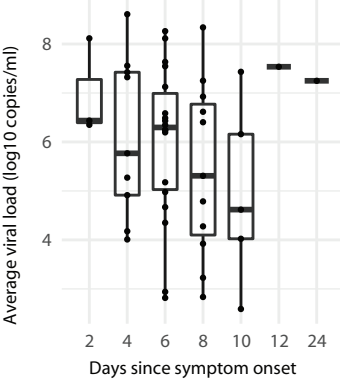

**Figure S3. SARS-CoV-2 viral load at different days post symptom onset.** Index cases (N=49) were asked when their symptoms started, and viral load was measured at study start. Individuals are binned together based on their reported symptom onset, relative to the study start. The y-axis shows the average viral load in log10 copies/ml extracted sample.
